# Supplementary material
Source: Springer Nature journal article supplement (https://www.springermedizin.de/resource/supplementary/12984_2012_387_MOESM2_ESM.pdf/9605956)

a

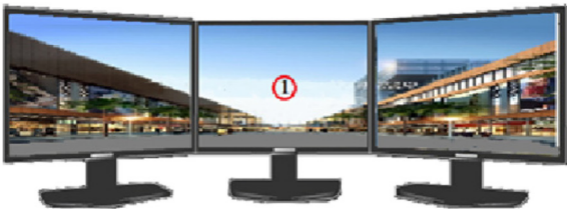

b

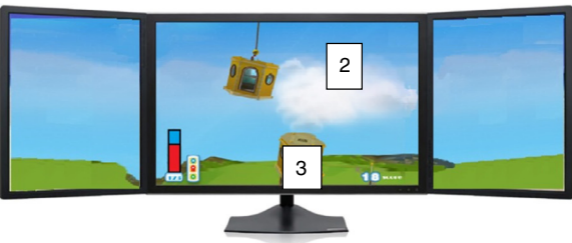

c

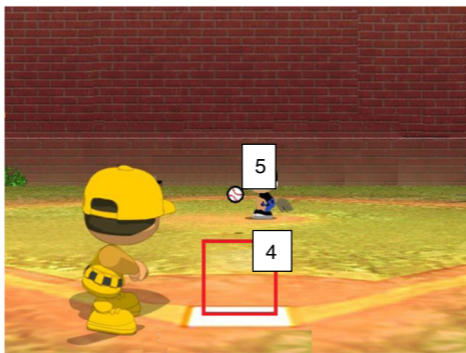

Supplement: MOESM2 [file 9605956]
